# Supplementary material
Source: ML conference proceedings conference paper supplement (https://openreview.net/forum?id=qIuIuGZU6A)
Supplement: supplementary_material [file attachment]

## Abstract

995 This supplementary material includes (1) details of task def-  
996 initions (§A.1), including a taxonomy of spatial aspects in  
997 Table 10 and curated functional programs in Table 11 and  
998 12, (2) setups of the tabletop scene and the shelf scene (§A.2),  
999 (3) a discussion on the sim-to-real relevance (§A.3), (4)  
1000 evaluation details, such as prompting procedures, essential  
1001 prompts, and evaluation efficiency (§A.4), and (5) details of  
1002 ESPIRE assets, including their visualizations and dimensions  
1003 (§A.5).

## 1004 A. Appendix

### 1005 A.1. Participants of a robotics task

1006 A robotics task, in its simplest form, can be defined by an  
1007 action and a manipulable object (e.g., ‘pick up the book’).  
1008 We employ two primitive actions, ‘pick’ and ‘place’, to  
1009 initiate robotics tasks. Keeping the action space simple helps  
1010 isolate spatial reasoning behaviors, allowing for a focus on  
1011 their analysis.

1012 To highlight the facets of spatial reasoning and support  
1013 systematic task design and experimental analysis, we cate-  
1014 gorize key spatial aspects ( $S$ ), reference frames ( $F$ ), and  
1015 reference objects ( $O$ ) that characterize spatial reasoning and  
1016 combine them to define task specifications (see Section 4.1).

1017 • **Reference frames.** Reference frames refer to coordinate  
1018 systems essential for describing one object in relation to  
1019 another. They can be made explicit via linguistic speci-  
1020 fications, but are usually implicitly conveyed within the  
1021 context. Following [25], we consider three types of refer-  
1022 ence frames.

- 1023 – **Relative frames** are viewer-centered; for example, ‘*be-*  
1024 *hind the mirror*’ may refer to the space further from the  
1025 viewer, from the viewer’s perspective toward the mirror.
- 1026 – **Intrinsic frames** are object-centered; for example, ‘*be-*  
1027 *hind the mirror*’ may indicate the space opposite to the  
1028 mirror’s facing direction, independent of the viewer.
- 1029 – **Absolute frames** are defined with respect to fixed  
1030 global coordinates, such as elevation and altitude (useful  
1031 for describing *below* and *above*) and cardinal directions  
1032 (e.g., *north* and *east*), but are only used in a few indoor  
1033 scenarios.

1034 • **Objects.** ESPIRE contains two primary object types: ma-  
1035 nipulable and reference objects.

- 1036 – **Manipulable objects** are instantiated as cuboid-shaped  
1037 books (see Table 18). The regular geometries make it  
1038 easier to verify their final states, facilitating automated  
1039 evaluation. Moreover, they yield a relatively high like-  
1040 lihood of generating valid grasping/placement poses,  
1041 without relying on external tools for pose proposal, yet  
1042 remain sufficiently challenging for 6-DoF tasks.

- **Reference objects** participate in describing an object in  
relation to another. In cases where a reference frame is  
not explicitly specified, the intrinsic frame of the refer-  
enced object may be used. Thus, we divide reference  
objects into *intrinsic-oriented* objects that have a clear  
front face (e.g., a chair or mirror) and *non-oriented*  
objects that do not (e.g., a jar or ball). To support fine-  
grained analysis of spatial reasoning, such as distin-  
guishing units of measure in distance estimation (meter  
vs. centimeter), we further divide reference objects into  
*near* and *distant* categories (see Table 16 and 17). Near  
objects appear on the shelf or tabletop, whereas distant  
objects are located outside these areas.

• **Spatial aspects.** We group spatial aspects into four broad  
classes: attributes, distances, relationships, and orienta-  
tions (see an overview in Table 10). Whenever applicable,  
we consider both coarse- and fine-grained expressions,  
such as relative distance and precise distance:

- **Attributes** primarily refer to intrinsic size attributes  
(i.e., dimensions) of an object, such as *height*, *length*,  
*width*, *volume*, and *diameter/radius*. They may be im-  
plicitly used to check space fitness and describe object  
volume, e.g., *a large/small book*.
- **Distances** describe the proximity between objects.  
Apart from relative distance descriptions like *nearest*,  
*farthest*, and *second farthest*, we include precise dis-  
tance descriptions using different units of measure, e.g.,  
*within 1 meter of the mirror* and *20 centimeters away*  
*from the jar*.
- **Relationships** primarily describes positional relations,  
i.e., how one object is positioned relative to another.  
They can be expressed in diverse ways in natural lan-  
guage, but we consider only the most commonly used  
basic forms like *left*, *right*, *in front of*, *behind*, *below*,  
and *above*, and their comparative and superlative forms  
like *leftmost*, *rightmost*, and *second leftmost*.
- **Orientations** cover directional expressions, including  
coarse-grained state descriptions (e.g., *upright* and *at*  
*a tilt*) and fine-grained clock positions (e.g., *to your 6*  
*o’clock*) and degrees of a tilt (e.g., *at a 45-degree tilt*).

We note that our definition of the task specification ( $C =$   
( $S, F, O$ )) primarily disentangles the complexity of spatial  
reasoning over ‘Relationships’ and ‘Orientations’, as they  
rely on a frame of reference, but ‘Attributes’ and ‘Distances’  
do not. Nonetheless, we use this definition across all four  
spatial aspects to keep consistent.

### A.2. Simulated Environment

We focus on tasks that involve picking up an object from  
the table and placing it on the shelf (see Figure 3). Though  
the reverse direction—picking up an object from the shelf  
and placing it on the table—is also feasible and would in-  
crease task diversity, we consider only the former because it

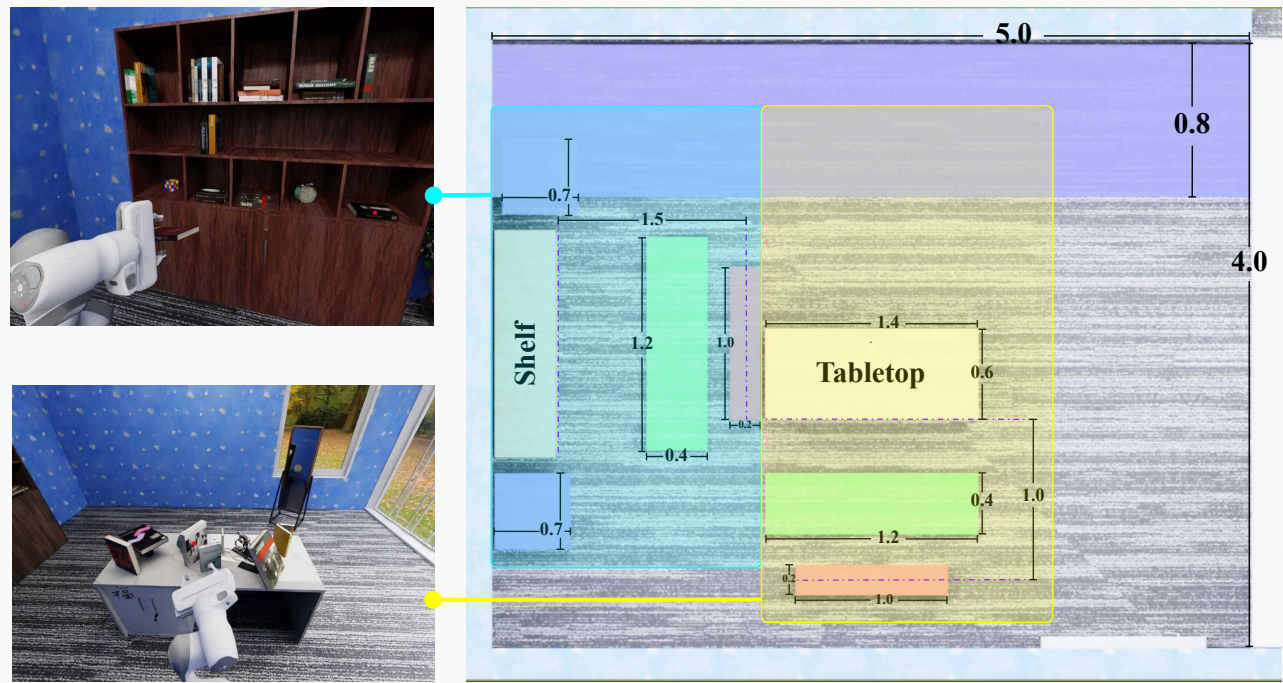

Figure 3. Layouts of the tabletop and shelf scenes within ESPIRE (best viewed in color). The light red region denotes the camera viewpoint sampling area, the light green region indicates where the robot end effector may appear, and the light blue region denotes where distant reference objects are placed. All labeled dimensions are in meters.

1095 alone suffices to cover a diverse range of spatial reasoning  
1096 scenarios.

1097 **Tabletop tasks.** The table scene is initialized with manipu-  
1098 lable books, support ornaments, and reference ornaments.  
1099 For books, we consider three different sizes (i.e., *small*,  
1100 *medium*, and *large*), and three different initial poses (i.e.,  
1101 *standing upright*, *lying flat*, and *at a tilt*). We use a small set  
1102 of support ornaments to create *flat* and *tilting* poses while  
1103 ensuring that the books are pickable via 6-DoF pose pre-  
1104 diction. Near references are small-sized, appearing on the  
1105 table (e.g., a picture frame or ceramic jar), whereas distant  
1106 references are large-sized, located on the floor behind the  
1107 table (e.g., a floor lamp or cheval mirror). Note that the  
1108 reference ornaments are carefully selected to cover intrinsic-  
1109 oriented and non-oriented categories, and the robot itself is  
1110 an intrinsic-oriented reference, always facing the front of  
1111 the table. We initialize the tabletop with two random near  
1112 objects and one random distant object. The degree of clutter  
1113 in the scene is controlled by varying the number of books on  
1114 the table, while the overall complexity is driven by instruc-  
1115 tions and environmental factors like varying poses, lights,  
1116 and textures.

1117 The global camera looks at a random point on the front

edge of the table. We randomly sample its elevation 0.5–  
1118 1m above the table surface. The elevation of the end-  
1119 effector is randomly sampled from 0.3–0.5m below the  
1120 global camera, with pitch, yaw, roll randomly sampled from  
1121  $[-22.5^\circ, 22.5^\circ]$ ,  $[-22.5^\circ, 22.5^\circ]$ , and  $[-45^\circ, 45^\circ]$ , respec-  
1122 tively. 1123

1124 **Shelf tasks.** The shelf scene contains the same types of  
1125 objects as in the tabletop scene. Analogously to the tabletop  
1126 scenes, where books are initialized in random grasping poses,  
1127 we initialize the shelf with random support ornaments to  
1128 let books lean against, creating various placement poses.  
1129 Compared with the tabletop scene, the shelf scene supports  
1130 reasoning of two additional spatial relationships: *above* and  
1131 *below*. We locate distant references on the floor, either to the  
1132 left or to the right of the shelf. The robot always faces the  
1133 front of the shelf. We control the complexity of shelf tasks  
1134 by varying shelf layouts, including horizontal panels, grids  
1135 of slots, and their combinations.

1136 The global camera always faces the shelf center. We  
1137 randomly sample its elevation 1.2–1.5m above the ground.  
1138 The elevation of the end-effector is randomly sampled from  
1139 0.3–0.5m below the global camera, with pitch, yaw, roll  
1140 randomly sampled from  $[-22.5^\circ, 22.5^\circ]$ ,  $[-22.5^\circ, 22.5^\circ]$ , 1140

1141 and  $[-120^\circ, -60^\circ] \cup [60^\circ, 120^\circ]$ , respectively.

1142 **Definitions of spatial relationships and orientations.** In  
1143 natural language, spatial relationships can exhibit ambiguity  
1144 due to the reliance on reference frames and contexts. To  
1145 address this issue, we use a unified definition to assign them  
1146 unambiguous geometric interpretations. Specifically, under  
1147 a given reference frame, we use its forward axis to represent  
1148 the front-facing direction, then *left* and *right* are defined  
1149 relative to it. The definition of *behind* is, however, more  
1150 involved, as it depends on the reference frame. Suppose the  
1151 description ‘ $O_1$  is *behind*  $O_2$ ’, when the reference frame is  
1152 independent of  $O_2$ , it is interpreted as:  $O_1$  is further than  $O_2$   
1153 along the front-facing direction; when the reference frame is  
1154 attached to  $O_2$ , the meaning changes to:  $O_1$  is further along  
1155 the opposite of the front-facing direction.

1156 We account for two fine-grained types of orientation:  
1157 direction and tilt. Directions are represented using clock  
1158 positions that provide a granular description relative to a  
1159 specific reference frame. In this setup, the forward axis  
1160 is assigned to 12 o’clock, with all other positions mapped  
1161 relative to this heading. To describe precise tilts, we measure  
1162 the tilt angle in degrees and define it as the deviation between  
1163 the global up-axis and the upright axis of the object.

1164 **Definitions of ‘above’ and ‘below’.** The global up-axis  
1165 corresponds to the up-direction of an absolute reference  
1166 frame, defined as the surface normal of the floor in our  
1167 simulation environment. We also rely on this global up-  
1168 axis to define spatial relationships like *above* and *below*.  
1169 Specifically, ‘ $O_1$  is *above*  $O_2$ ’ indicates that  $O_1$  lies further  
1170 along the global up-axis; equivalently, ‘ $O_2$  is *below*  $O_1$ ’.  
1171 Following the standard convention, we define the tilt angle  
1172 as the angle between the up axis and the surface normal of  
1173 an object.

1174 **Mitigation of ambiguity.** For objects involved in tabletop  
1175 tasks, we randomly initialize their locations while ensuring  
1176 that they are spaced at least 5cm apart. Note that due to  
1177 physical rendering constraints, the final spacing may be  
1178 smaller than 5cm. We require that at least 20% of the pixels  
1179 of each object are visible in the global view. For shelf tasks,  
1180 we require that at least 50% of the pixels of the book in hand  
1181 are visible. When a target satisfies multiple constraints (e.g.,  
1182 a book can be behind the picture while also being to its left),  
1183 we select the most salient one for task generation.

1184 **Balanced task sampling.** To ensure that ESPIRE tasks are  
1185 approximately uniformly distributed across task families  $\mathcal{T}$   
1186 and difficulty levels  $\mathcal{L} = \{\text{easy, medium, hard}\}$ , we propose  
1187 a balanced task sampling strategy (see Algorithm 1). Specif-  
1188 ically, we maintain a counter  $C_{t,l}$  for each combination of

task family  $t \in \mathcal{T}$  and difficulty level  $l \in \mathcal{L}$ . We also record  
the number of times each scene  $s \in \mathcal{S}$  has been attempted so  
far, denoted by  $A_s$ . These counters are used to dynamically  
adjust the sampling weights (lines 15 and 21).

During task generation, we first select a task family  
with preference for underrepresented families (lines 12–15).  
Given the selected task family, we collect all scenes that  
yield a non-empty answer set and randomly sample one, fa-  
voring underrepresented difficulty levels while penalizing  
scenes that have been repeatedly attempted (lines 16–19).  
We repeat this process until the desired number of tasks has  
been generated.

### A.3. Sim-to-real relevance

To confirm ESPIRE serves as a reliable proxy for embod-  
ied spatial reasoning, we establish the benchmark’s validity  
through the following two lens:

**Performance alignment.** We evaluated Qwen3-VL  
(8B/30B/235B), RoboBrain2.0-7B and Gemini2.5-Pro on  
ESPIRE and the pointing tasks of the natural-image bench-  
mark RefSpatial [59]. We then compute Spearman’s rank  
correlation between the model performance rankings on the  
two benchmarks. The resulting correlation is 96.4% (with  
 $p = 0.00498$ ), indicating strong alignment between the two  
evaluations and suggesting that ESPIRE serves as a high-  
fidelity proxy for real-world embodied spatial reasoning.

**Human study.** We conducted a study with five humans to  
assess environment realism and model alignment (see Sec-  
tion 5.5). First, we observe an average  $94.9 \pm 3.4\%$  human  
success rate across all tasks, suggesting that the simulated  
scenarios are readily interpretable and solvable by humans.

We further analyze agreement on the ground-truth refer-  
ence frame across three reference categories: near oriented  
objects, distant oriented objects, and the table. Specifically,  
we measure the proportion of examples with unanimous  
agreement among the five annotators. For examples involv-  
ing distant oriented references and the table, humans agree  
on the reference frame in more than 97% of cases, suggesting  
that the intended frame is clearly interpretable in these set-  
tings. However, only 31.03% of the examples involving near  
oriented references yield unanimous agreement. This lower  
agreement likely reflects the inherent ambiguity of reasoning  
with nearby oriented objects, as discussed in Section 5.5.

### A.4. Evaluation

**Task status checking.** After execution, we obtain task sta-  
tus (e.g., failure or success) by checking if the final environ-  
ment state satisfies the constraints specified in the instruction.  
(1) *Distance* is measured as the minimum distance between  
the boundaries of the target and the reference object (which  
can be a 3D point). The final distance within  $\pm 3$  cm of the

**Algorithm 1** Balanced Task Sampling

---

```

1: Input: Task families  $\mathcal{T}$ , scenes  $\mathcal{S}$ , difficulty levels  $\mathcal{L} = \{\text{easy, medium, hard}\}$ , the number of tasks per family  $N_t$ , the number of tasks in total  $N_{\text{all}}$ .
2: Initialize task counts  $\{C_{t,l}\}_{t \in \mathcal{T}, l \in \mathcal{L}} \leftarrow 0$ 
3: Initialize scene attempts  $\{A_s\}_{s \in \mathcal{S}} \leftarrow 0$ 
4: Initialize the task set  $\mathcal{Q} \leftarrow \emptyset$ 
5:  $N \leftarrow 0$ 
6: while ELIGIBLEFAMILY( $\mathcal{T}, \mathcal{S}$ )  $\neq \emptyset$  do
7:   if  $N_{\text{all}}$  is defined and  $N \geq N_{\text{all}}$  then
8:     break
9:   end if
10:   $\mathcal{T}_{\text{sub}} \leftarrow \{t \in \mathcal{T} \mid \sum_l C_{t,l} < N_t, \text{GETCOMPATIBLESCENES}(t, \mathcal{S}) \neq \emptyset\}$ 
11:  if  $\mathcal{T}_{\text{sub}} = \emptyset$  then
12:    break
13:  end if
14:  for all  $t \in \mathcal{T}_{\text{sub}}$  do
15:     $w_t \leftarrow \frac{1}{\sum_l C_{t,l} + 1}$  ▷ Under-sampled task families
16:  end for
17:   $t^* \leftarrow \text{WEIGHTEDSAMPLING}(\mathcal{T}_{\text{sub}}, \{w_t\})$ 
18:   $\mathcal{S}_{t^*} \leftarrow \text{GETCOMPATIBLESCENES}(t^*, \mathcal{S})$ 
19:  for all  $s \in \mathcal{S}_{t^*}$  do
20:     $l \leftarrow \text{GETDIFFICULTYLEVEL}(t^*, s)$ 
21:     $w_s \leftarrow \frac{1}{\sum_{t'} C_{t',l} + 1} \cdot \frac{1}{(A_s + 1)^2}$  ▷ Under-sampled scenes and difficulty levels
22:  end for
23:   $s^* \leftarrow \text{WEIGHTEDSAMPLING}(\mathcal{S}_{t^*}, \{w_s\})$ 
24:   $q \leftarrow \text{GENERATEANSWERSET}(t^*, s^*)$ 
25:   $A_{s^*} \leftarrow A_{s^*} + 1$ 
26:  if  $|q| > 1$  then ▷ Retain only non-trivial tasks
27:     $l^* \leftarrow \text{GETDIFFICULTYLEVEL}(s^*, t^*)$ 
28:     $\mathcal{Q} \leftarrow \mathcal{Q} \cup \{(t^*, s^*)\}$ 
29:     $C_{t^*,l^*} \leftarrow C_{t^*,l^*} + 1$ 
30:     $N \leftarrow N + 1$ 
31:  end if
32: end while
33: return  $\mathcal{Q}$ 

```

---

**Algorithm 2** Localization Procedures**(a)** Localization w/o Reflection

```

1: Input: Task instruction  $T$ , Scene observation  $O$ , Maximum trials  $N$ 
2: for  $i = 1$  to  $N$  do
3:    $P \leftarrow \text{PREDICT}(T, O)$ 
4:    $R \leftarrow \text{EVALUATE}(P)$ 
5:   if  $R.\text{success}$  then
6:     break ▷ Stop if successful
7:   end if
8: end for

```

**(b)** Localization w/ Reflection

```

1: Input: Task instruction  $T$ , Scene observation  $O$ , Maximum trials  $N$ 
2:  $F, R_0 \leftarrow \text{None}$ 
3: for  $i = 1$  to  $N$  do
4:    $P \leftarrow \text{PREDICT}(T, O, F, R_0)$ 
5:    $R_1 \leftarrow \text{EVALUATE}(P)$ 
6:   if  $R.\text{success}$  then
7:     break
8:   end if
9:    $F \leftarrow \text{REFLECT}(T, O, R)$ 
10:   $R_0 \leftarrow R_1$ 
11: end for

```

---

1238 expected distance is considered correct in the evaluation. (2)  
1239 *Orientation and Relationship* are determined by checking  
1240 if the center of the target lies in the target area defined by  
1241 a reference frame. The final tilt angle within  $\pm 10^\circ$  of the  
1242 expected angle is considered correct in the evaluation.

1243 **Algorithms.** We illustrate the evaluation procedures used  
1244 for localization in Algorithm 2a (w/o reflection) and Algo-  
1245 rithm 2b (w/ reflection). Reflection is performed following a  
1246 localization failure (line 9 of Algorithm 2b). The generated

reflection tokens are added to the inputs to the next itera-  
tion (line 4 of Algorithm 2b). The evaluation procedures  
for execution are illustrated in Algorithm 3a (w/o reflection)  
and Algorithm 3b (w/ reflection). They are similar to those  
used for localization except that the reflection for execution  
relies on an additional view of the failure state (line 9–12 of  
Algorithm 3b).

**Prompts.** We provide our customized prompts for *pick*  
tasks with Qwen3-VL [2]. Figures 4a, 4b, 5a, and 5b show

**Algorithm 3** Execution Procedures

## (a) Execution w/o Reflection

```

1: Input: Task configuration  $T$ , Scene observation  $O$ , Maximum trials  $N$ 
2: for  $i = 1$  to  $N$  do
3:    $P \leftarrow \text{PREDICT}(T, O)$ 
4:    $R \leftarrow \text{EVALUATE}(P)$ 
5:   if  $R.\text{success}$  then
6:     break ▷ Stop if task is done
7:   end if
8:    $O \leftarrow \text{GETOBSERVATION}()$ 
9: end for

```

## (b) Execution w/ Reflection

```

1: Input: Task configuration  $T$ , Initial observation  $O$ , Maximum trials  $N$ 
2:  $F, O_0, R_0 \leftarrow \text{None}$ 
3: for  $i = 1$  to  $N$  do
4:    $P \leftarrow \text{PREDICT}(T, O, F, O_0, R_0)$ 
5:    $R_1 \leftarrow \text{EVALUATE}(P)$ 
6:   if  $R_1.\text{success}$  then
7:     break
8:   end if
9:    $O_0 \leftarrow O$ 
10:   $R_0 \leftarrow R_1$ 
11:   $O \leftarrow \text{GETOBSERVATION}()$ 
12:   $F \leftarrow \text{REFLECT}(T, O, O_0, R_0)$ 
13: end for

```

1256 the prompts used for localization, execution, localization  
1257 w/ reflection, and rotation, respectively. They are different  
1258 across VLMs primarily in the output format, e.g., Gemini2.5-  
1259 Pro [44] outputs point coordinates in  $[y, x]$  while others in  
1260  $[x, y]$ . The differences in the prompts for *pick* and *place*  
1261 tasks arise primarily in the task descriptions. For example,  
1262 a localization instruction for *place* tasks could be: ‘*Given a*  
1263 *scene image and a textual description specifying the place-*  
1264 *ment conditions for a book currently held by a robot gripper,*  
1265 *you are required to determine the exact placement location*  
1266 *in the image.*’

1267 **Evaluation Time.** We break down the evaluation time  
1268 along the evaluation stage (see Table 9). The results are aver-  
1269 aged across all tasks and attempts. We record the time taken  
1270 until a successful attempt is achieved. During execution, the  
1271 environment updates after each move and in each observation  
1272 query, so we also report the average number of environment  
1273 updates over successful tasks. Compared to the model infer-  
1274 ence time in localization and execution, the environment  
1275 update is quite quick, i.e., it takes an average of 11.65 sec-  
1276 onds per update. Models with reflection enabled generally  
1277 take longer because they require additional API calls. A  
1278 higher number of environment updates indicates more ex-  
1279 ecution attempts. For example, RoboBrain2.0-7B [38] not  
1280 only requires the largest number of environment updates but  
1281 also achieves the lowest success rate, suggesting its weaker  
1282 capability in execution.

1283 **Running Examples.** We provide running examples with  
1284 Qwen3-VL-235B-A22B [2]. Figure 6 shows an excerpt  
1285 of the localization (w/ reflection) logs of a *pick* task, and  
1286 Figure 8 shows an example run on a *place* task without  
1287 reflection.

1288 Figure 9 shows an excerpt of the execution (w/o reflec-  
1289 tion) logs of a *pick* task. Note that, in this example, the  
1290 model also needs to predict rotations for the *pitch* axis. Fig-  
1291 ure 10 presents an excerpt of the execution (w/ reflection)

logs of a *place* task. In this task, the model must predict a  
goal position for the end-effector. Interestingly, the model  
fails in the first attempt but succeeds by leveraging reflection  
in the second attempt.

**Qualitative analysis.** We further conduct a qualitative  
analysis, including both successful runs and failed runs in  
Table 8.

**A.5. Asset Visualization**

We visualize primary assets of ESPIRE, including near refer-  
ence objects in Table 16, distant reference objects in Table 17,  
tables in Table 13, shelf layouts in Table 14, shelf textures  
in Table 15, manipulable books in Table 18, and support  
ornaments in Table 19.

Table 8. Qualitative analysis. We categorize intermediate executions into following six types: T1 denotes a grasp-favorable viewpoint; T2 denotes a grasp-infeasible viewpoint; T3 denotes manipulator occlusion; T4 denotes object occlusion; T5 denotes unrecognizable target; and T6 denotes physically-achievable execution.

| Model                                                                              | Step 1                                                                              | Step 2                                                                              | Step 3                                                                              | Step 4                                                                               | Step 5                                                                                | Step 6                                                                                |
|------------------------------------------------------------------------------------|-------------------------------------------------------------------------------------|-------------------------------------------------------------------------------------|-------------------------------------------------------------------------------------|--------------------------------------------------------------------------------------|---------------------------------------------------------------------------------------|---------------------------------------------------------------------------------------|
| <i>Find a book at 12 o'clock of the cheval mirror from the table, and grab it.</i> |                                                                                     |                                                                                     |                                                                                     |                                                                                      |                                                                                       |                                                                                       |
| 235B                                                                               |    |    |    |    |    |    |
|                                                                                    | T2                                                                                  | T2                                                                                  | T2                                                                                  | T1                                                                                   | T6                                                                                    | Execution                                                                             |
| 235B                                                                               |    |    |    |    |    |    |
|                                                                                    | T2                                                                                  | T2                                                                                  | T2                                                                                  | T2                                                                                   | T2                                                                                    | Execution                                                                             |
| <i>Place the book in the shelf position (row 1, column 5).</i>                     |                                                                                     |                                                                                     |                                                                                     |                                                                                      |                                                                                       |                                                                                       |
| 30B                                                                                |   |   |   |   |   |   |
|                                                                                    | T5                                                                                  | T6                                                                                  | T4                                                                                  | T6                                                                                   | Execution                                                                             |                                                                                       |
| 30B                                                                                |  |  |  |  |  |  |
|                                                                                    | T6                                                                                  | T3                                                                                  | T4                                                                                  | T6                                                                                   | T6                                                                                    | Execution                                                                             |

Table 9. Breakdowns of evaluation time in seconds (s).

| Models             | Pick             |               |          |             | Place            |               |          |             |
|--------------------|------------------|---------------|----------|-------------|------------------|---------------|----------|-------------|
|                    | localization (s) | execution (s) | # update | success (%) | localization (s) | execution (s) | # update | success (%) |
| w/o reflection     |                  |               |          |             |                  |               |          |             |
| Gemini2.5-Pro      | 22.37            | 40.53         | 6.86     | 34.06       | 33.00            | 41.15         | 9.01     | 15.70       |
| InternVL3-78B      | 14.44            | 32.21         | 6.92     | 17.26       | 19.06            | 34.04         | 7.59     | 9.67        |
| RoboBrain2.0-7B    | 14.17            | 27.56         | 9.07     | 10.87       | 19.08            | 30.83         | 9.36     | 8.64        |
| Qwen3-VL-8B        | 15.44            | 34.87         | 6.73     | 29.32       | 19.48            | 35.86         | 7.83     | 12.41       |
| Qwen3-VL-30B-A3B   | 12.50            | 30.61         | 6.86     | 32.15       | 17.38            | 32.59         | 7.39     | 20.00       |
| Qwen3-VL-235B-A22B | 16.08            | 34.49         | 7.38     | 26.76       | 20.40            | 37.55         | 7.64     | 19.34       |
| w/ reflection      |                  |               |          |             |                  |               |          |             |
| Qwen3-VL-8B        | 23.94            | 44.88         | 8.58     | 15.07       | 31.22            | 47.58         | 9.31     | 6.67        |
| Qwen3-VL-30B-A3B   | 21.51            | 44.70         | 8.37     | 17.08       | 27.99            | 49.29         | 8.13     | 13.80       |
| Qwen3-VL-235B-A22B | 33.23            | 66.83         | 8.12     | 23.20       | 44.03            | 68.58         | 8.53     | 15.40       |

You are an expert Visual-Language Assistant specialized in embodied pointing tasks. Note that any occurrence of “You” denotes the first-person camera viewpoint of the RGB image (i.e., the perceptual perspective). It does NOT refer to any object, robot, or robotic end-effector visible in the image.

**Task:** Identify the object in an RGB image according to a detailed textual description and provide precise coordinates for the object that match the input conditions.

**Inputs:** 1. A text description specifying the book that needs to be located, including all required attributes and conditions. 2. An RGB image representing the scene, captured from your perceptual viewpoint.

**Output:** Locate the target object with a point, report its point coordinate in JSON format like this: “point\_2d”: [x, y]

(a) Localization in *pick* tasks.

You are an expert Visual-Language Assistant specialized for embodied robot-arm manipulation.

**Task:** Determine the target position of the robotic arm’s end-effector to grasp a specific book, where the book is marked with a colored bounding box. Choose a grasp point that is easily reachable and suitable for the robot’s end-effector, avoiding edges or positions that are obstructed or unstable. The grasp point should allow the robot to securely pick up the book without collisions or slippage.

**Note:** If the predicted target point lies on the target book, the robot will attempt to directly grasp the book at that location. If the predicted point lies on another object or a free-space region, the robot will move its end-effector to the indicated position.

**Inputs:** 1. An RGB image representing the scene, where the target book is marked with a colored bounding box. 2. A textual instruction that specifies how the robot should grasp the book.

**Output:** Locate the target position with a point, report its point coordinate in JSON format like this: “point\_2d”: [x, y]

(b) Execution in *pick* tasks.

Figure 4. Example prompts with Qwen3-VL (continued).

You are an expert Visual-Language Assistant specialized in reflective analysis of embodied pointing tasks.

**Task:** Analyze the previous prediction error in the image grounding task. The incorrect predicted point has been marked with a red circle on the RGB image. Reflect on why the model’s prediction failed and explain what visual or textual cues were misunderstood or ignored.

**Inputs:** 1. The original textual description specifying the target object and its required attributes or conditions. 2. The same RGB image used in the grounding task, now containing the red circle marking the incorrect prediction.

**Output:** Provide a detailed textual reflection explaining: - The likely cause of the failure (e.g., visual confusion, incorrect attribute matching, spatial misinterpretation, etc.). - The correct reasoning process that should have been applied. - Suggestions for how to improve the next prediction.

(a) Localization w/ reflection in *pick* tasks.

You are an expert Visual-Language Assistant specialized for embodied robot-arm manipulation and precise grasp orientation control.

**Task:** Given an RGB image with a colored bounding box marking the target book and a red dot indicating the moving target position, together with a textual instruction specifying the book attributes and required rotation axes (pitch, yaw, roll), predict the end-effector’s **rotation offsets** relative to its current orientation. All rotations are defined in the **target book’s local coordinate frame**.

**Inputs:** 1. RGB image: - Target book marked by a colored bounding box. - Moving target position marked by a red dot. 2. Text instruction describing the target book and specifying which rotation axes to output.

**Reference Frame:** Rotations follow the book’s intrinsic axes (forward–backward, left–right, up–down): - **Pitch:** tilt up/down. - **Yaw:** swing left/right. - **Roll:** roll clockwise/counterclockwise. Positive/negative follow standard right-hand conventions.

**Output:** Return the predicted rotation offsets (degrees) in JSON: “json “rotation”: [pitch, yaw, roll]

(b) Rotation prediction in *pick* tasks, summarized by GPT-5.1 for the demonstration purpose.

Figure 5. Example prompts with Qwen3-VL.

**ENV:** {**task\_instruction:** from the items on the table, find a book more than 120cm away from you, and fetch it. **category:** pick}

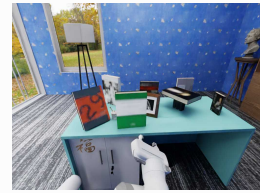

**VLM:** {**system\_prompt:** [see Figure 4a], **user:** from the items on the table, find a book more than 120cm away from you, and fetch it. **assistant:** {point\_2d: [757, 448], label: book more than 120cm away from you}}

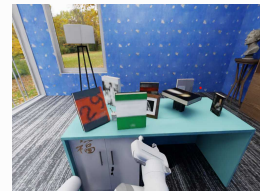

**ENV:** {**moved:** false, **success:** false}

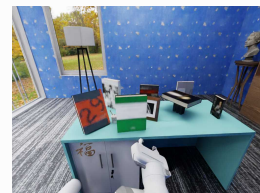

**VLM:** {**system\_prompt:** [see Figure 5a], **user:** The previous visual grounding attempt for the [task\_instruction] was incorrect. The red circles in the image mark the wrong grounding regions. Please carefully analyze the image and the instruction again, understand why the previous prediction was wrong, and describe what should be corrected in the next attempt. **assistant:** The previous prediction was incorrect because it failed to properly interpret the spatial constraint in the instruction... **Why the Previous Prediction Was Wrong:** 1. Misinterpretation of Spatial Distance 2. Focus on Object Type Only... **What Should Be Corrected in the Next Attempt:** 1. Incorporate Spatial Reasoning 2. Re-evaluate All Books on the Table...}

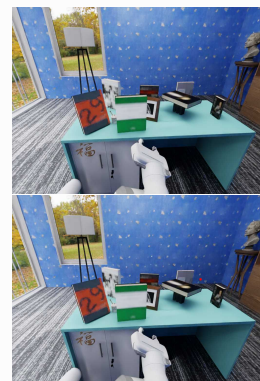

**VLM:** {**system\_prompt:** [see Figure 4b], **user:** Here is a reflection on the previous failed attempt and some suggestions: [reflection]. Now, complete this task: from the items..., **assistant:** {point\_2d: [745, 400]}}

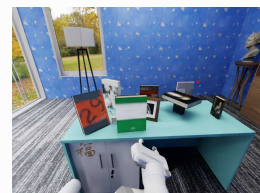

**ENV:** {**moved:** false, **success:** false}

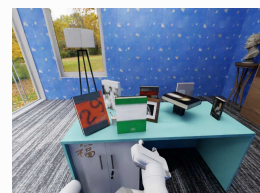

Figure 6. Pick localization example with reflection, where the prompt simplified for better demonstration.

**VLM:** {**system\_prompt:** [see Figure 5a], **user:** The previous visual grounding attempt for the [task\_instruction] was incorrect. The red circles in the image mark the wrong grounding regions. Please carefully analyze the image and the instruction again, understand why the previous prediction was wrong, and describe what should be corrected in the next attempt. **assistant:** The previous prediction was incorrect because it focused on a region on the wall... **Why the Error Occurred:** - Misinterpretation of “items on the table” - Failure to filter by object class... **What Should Be Corrected in the Next Attempt:** 1. Identify all books on the table 2. Estimate distance from the agent (robot arm)...}

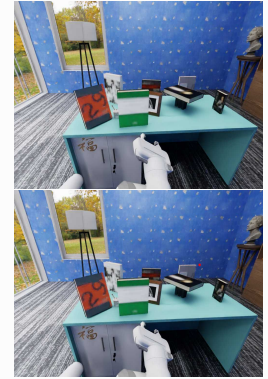

**VLM:** {**system\_prompt:** [see Figure 4b], **user:** Here is a reflection on the previous failed attempt and some suggestions: [reflection]. Now, complete this task: from the items..., **assistant:** {point\_2d: [835, 555]}}

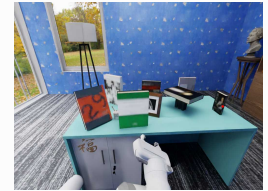

**ENV:** {**moved:** false, **success:** true}

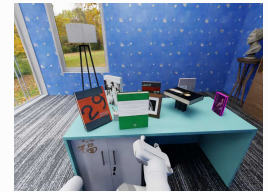

Figure 7. Pick localization example (subsequent attempts and successful execution).

**ENV:** {**task\_instruction:** position the book in row 1, column 3 of the shelf. **category:** place}

**VLM:** {**system\_prompt:** [see Figure 4a], **user:** position the book in row 1, column 3 of the shelf. **assistant:** {**point\_2d:** [640, 224]}}

**ENV:** {**moved:** false, **success:** true}

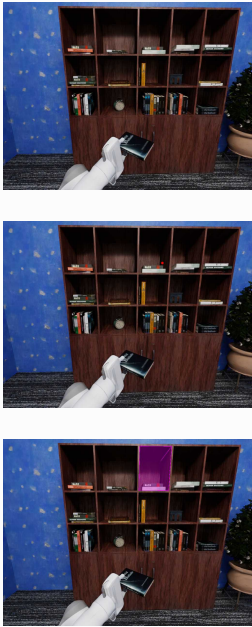

Figure 8. Place localization example without reflection, where the prompt simplified for better demonstration.

**ENV:** {**task\_instruction:** from the items on the table, find a book more than 120cm away from you, and fetch it. **category:** pick}

**VLM:** {**system\_prompt:** [see Figure 4b], **user:** reach for the book that needs to be grabbed; this book is marked by a bounding box of the red color. **assistant:** {**point\_2d:** [825, 541], **label:** target book}} {**system\_prompt:** [see Figure 5b], **user:** [task\_instruction] + The rotation delta(s) you should predict: pitch, **assistant:** {**rotation:** [5.0, null, null]}}

**ENV:** {**moved:** true, **success:** true}

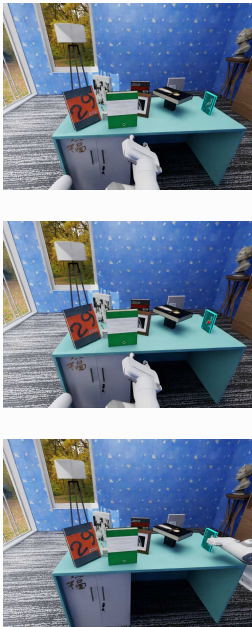

Figure 9. Pick execution example without reflection, where the prompt simplified for better demonstration.

**ENV:** {**task\_instruction:** position the book in row 1, column 3 of the shelf. **category:** place}

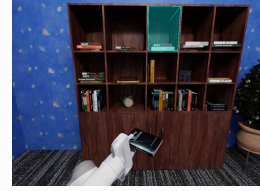

**VLM:** {**system\_prompt:** [see Figure 4b], **user:** Reach for the location where the book in your hand needs to be placed. The book in your hand should be placed in the vertical manner, and the placement area is marked by a bounding box in the cyan color. **assistant:** {**point\_2d:** [587, 194]}}

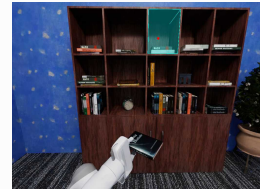

**ENV:** {**moved:** true, **success:** false}

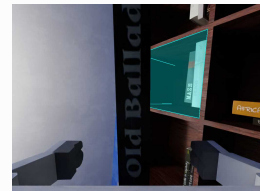

**VLM:** {**system\_prompt:** [see Figure 5a], **user:** The previous visual moving attempt for the [task\_instruction] was incorrect. The red circles in the image mark the wrong moving regions. Please carefully analyze the image and the instruction again, understand why the previous prediction was wrong, and describe what should be corrected in the next attempt. **assistant:** The failure in the previous attempt stems from a misinterpretation of the spatial relationship between the cyan bounding box and the robot's reachable workspace... **Likely Cause of Failure:** Target Point Misplacement... Kinematic limits... **Suggestions for Improving the Next Prediction:** Focus on the shelf surface, not the back wall... Prioritize reachable points...}

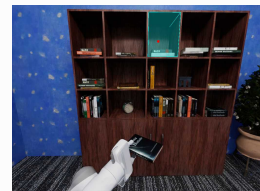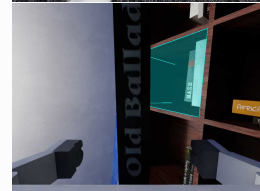

**VLM:** {**system\_prompt:** [see Figure 4b], **user:** Here is a reflection on the previous failed attempt and some suggestions: [reflection]. Now, complete this task: Reach for the location .... **assistant:** {**point\_2d:** [684, 418]}}

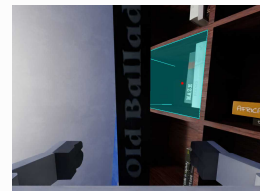

**ENV:** {**moved:** true, **success:** true}

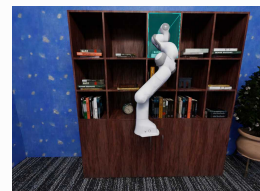

Figure 10. Place execution example with reflection, where the prompt simplified for better demonstration.

Table 10. Spatial aspects of varying granularities. nil indicates no input parameters are required. Note that *left*, *right*, *front*, *behind*, *above*, and *below* are reloaded as *directional* relations in ‘Orientation’ (cf. *positional* relations in ‘Relationship’).

| Spatial Aspect | Granularity | Type          | Input                                                                          | Example Instruction                                                  |
|----------------|-------------|---------------|--------------------------------------------------------------------------------|----------------------------------------------------------------------|
| Attribute      | Coarse      | Small         | nil                                                                            | <i>take a small book from the table</i>                              |
|                |             | Medium        | nil                                                                            | <i>take a medium-sized book</i>                                      |
|                |             | Large         | nil                                                                            | <i>take a large book</i>                                             |
|                |             | Empty         | nil                                                                            | <i>place the book in an empty slot</i>                               |
|                |             | NonEmpty      | nil                                                                            | <i>place the book in a partly occupied slot</i>                      |
|                |             | Emptiest      | nil                                                                            | <i>place the book in the emptiest slot</i>                           |
|                | Fine        | Height        | (#,)                                                                           | <i>take a book around 20 centimeters high</i>                        |
|                |             | Width         | (#,)                                                                           | <i>place the book in a slot around 45 centimeters wide</i>           |
|                |             | Index1D       | (#,)                                                                           | <i>place the book at row 2 of the shelf</i>                          |
|                |             | Index2D       | (#,#)                                                                          | <i>place the book at row 2, column 3 of the shelf</i>                |
| Distance       | Coarse      | Closest       | nil                                                                            | <i>take a book among the books closest to you</i>                    |
|                |             | Farthest      | nil                                                                            | <i>take a book among the books farthest from you</i>                 |
|                |             | LessThan      | (#,)                                                                           | <i>place the book in a slot within 1.5 meters of you</i>             |
|                |             | MoreThan      | (#,)                                                                           | <i>take a book more than 1.5 meters away from you</i>                |
|                | Fine        | RankClosest   | (#,)                                                                           | <i>take a book among the books <b>second</b> closest to you</i>      |
|                |             | RankFarthest  | (#,)                                                                           | <i>take a book among the books <b>second</b> farthest from you</i>   |
|                |             | EqualTo       | (#,)                                                                           | <i>take a book about 1.5 meters away from you</i>                    |
|                |             | Range         | (#,#)                                                                          | <i>take a book 1.5 to 2 meters away from you</i>                     |
| Relationship   | Coarse      | Left          | nil                                                                            | <i>take a book on the left of the table</i>                          |
|                |             | Right         | nil                                                                            | <i>place the book in a slot on the left of the shelf</i>             |
|                |             | Front         | nil                                                                            | <i>take a book at the front of the table</i>                         |
|                |             | Behind        | nil                                                                            | <i>take a book at the back of the table</i>                          |
|                |             | Upper         | nil                                                                            | <i>place the book in a slot in the upper part of the shelf</i>       |
|                |             | Lower         | nil                                                                            | <i>place the book in a slot in the lower part of the shelf</i>       |
|                |             | LeftMost      | nil                                                                            | <i>take the leftmost book from the table</i>                         |
|                | RightMost   | nil           | <i>place the the book in a leftmost slot on the shelf</i>                      |                                                                      |
|                | Fine        | RankLeftMost  | (#,)                                                                           | <i>take the <b>second</b> leftmost book on the table</i>             |
|                |             | RankRightMost | (#,)                                                                           | <i>place the book in a <b>second</b> rightmost slot on the shelf</i> |
| Between        |             | (#,#)         | <i>place the book between the <b>alarm clock</b> and the <b>succulents</b></i> |                                                                      |
| Orientation    | Coarse      | Flat          | nil                                                                            | <i>take a flat-lying book from the table</i>                         |
|                |             | Vertical      | nil                                                                            | <i>place the book upright on the shelf</i>                           |
|                |             | Tilted        | nil                                                                            | <i>place the book at a tilt on the shelf</i>                         |
|                |             | Left          | nil                                                                            | <i>take a book to your left</i>                                      |
|                |             | Right         | nil                                                                            | <i>place the book in a slot to your right</i>                        |
|                |             | Front         | nil                                                                            | <i>place the book in front of the teddy bear</i>                     |
|                |             | Behind        | nil                                                                            | <i>take a book behind the picture frame</i>                          |
|                |             | Above         | nil                                                                            | <i>place the book in a slot above the picture frame</i>              |
|                |             | Below         | nil                                                                            | <i>place the book in a slot below the picture frame</i>              |
|                | Fine        | DirectLeft    | nil                                                                            | <i>place the book immediately to the left of the alarm clock</i>     |
|                |             | DirectRight   | nil                                                                            | <i>place the book immediately to the right of the succulents</i>     |
|                |             | DirectAbove   | nil                                                                            | <i>place the book in a slot directly above the alarm clock</i>       |
|                |             | DirectBelow   | nil                                                                            | <i>place the book in a slot directly below the picture frame</i>     |
|                |             | ClockPosition | (#,)                                                                           | <i>place the book in a slot to your 6 o'clock</i>                    |
|                |             | TiltDegree    | (#,)                                                                           | <i>place the book at a tilt angle of about 30 degrees</i>            |

Table 11. Example instruction families of *pick* tasks. The outermost `pick(·)` is discarded for simplicity. `unique(·)` ensures a unique item from the input set. `TABLE` returns all items in the tabletop scene.

| <i>S</i>                  | <i>F</i>                                                 | <i>O</i>                      | <i>R</i>                                 | <i>I</i>                                           | Example Program                                                                                              |
|---------------------------|----------------------------------------------------------|-------------------------------|------------------------------------------|----------------------------------------------------|--------------------------------------------------------------------------------------------------------------|
| Attribute                 |                                                          |                               | Small<br>Large<br>Medium                 |                                                    | <code>filterAttr\$R(filterBook(TABLE))</code>                                                                |
|                           |                                                          |                               | Height<br>Width                          | <i>float</i>                                       | <code>filterAttr\$R(I, filterBook(TABLE))</code>                                                             |
| Distance                  | <i>viewer</i><br><i>distant obj.</i><br><i>near obj.</i> |                               | RankClosest<br>RankFarthest              | <i>int</i>                                         | <code>filterDist\$R(I, filterBook(TABLE), O)</code>                                                          |
|                           |                                                          |                               | LessThan<br>MoreThan<br>EqualTo<br>Range | <i>list</i>                                        | <code>filterDist\$R(I, filterBook(TABLE), O)</code>                                                          |
| Relationship<br>intrinsic | <i>table</i>                                             |                               | Left<br>Right<br>Front<br>Behind         |                                                    | <code>filterRel\$R(filterBook(TABLE), O)</code>                                                              |
|                           |                                                          |                               | RankLeftMost<br>RankRightMost            | <i>int</i>                                         | <code>filterRel\$R(I, filterBook(TABLE), O)</code>                                                           |
|                           |                                                          |                               | Between                                  | <i>list</i>                                        | <code>filterRel\$R(filterBook(TABLE),<br/>filter(I<sub>1</sub>, TABLE), filter(I<sub>2</sub>, TABLE))</code> |
| relative                  | <i>viewer</i>                                            |                               | Left<br>Right                            |                                                    | <code>filterRel\$R(filterBook(TABLE), O)</code>                                                              |
|                           |                                                          |                               | RankLeftMost<br>RankRightMost            | <i>int</i>                                         | <code>filterRel\$R(I, filterBook(TABLE), O)</code>                                                           |
| Orientation               | <i>viewer</i><br><i>oriented</i>                         |                               | Left<br>Right<br>Front<br>Behind         |                                                    | <code>filterOri\$R(filterBook(TABLE), O)</code>                                                              |
|                           |                                                          |                               | RankLeftMost<br>RankRightMost            | <i>int</i>                                         | <code>filterOri\$R(I, filterBook(TABLE), O)</code>                                                           |
|                           |                                                          |                               | Flat<br>Vertical<br>Tilted               |                                                    | <code>filterOri\$R(filterBook(TABLE))</code>                                                                 |
|                           |                                                          | ClockPosition                 | <i>int</i>                               | <code>filterOri\$R(I, filterBook(TABLE), O)</code> |                                                                                                              |
|                           |                                                          | TiltDegree                    | <i>float</i>                             | <code>filterOri\$R(I, filterBook(TABLE), O)</code> |                                                                                                              |
|                           | relative<br><i>viewer</i><br><i>non-oriented</i>         |                               | Left<br>Right<br>Front<br>Behind         |                                                    | <code>filterOri\$R(filterBook(TABLE), O)</code>                                                              |
|                           |                                                          | RankLeftMost<br>RankRightMost | <i>int</i>                               | <code>filterOri\$R(I, filterBook(TABLE), O)</code> |                                                                                                              |
|                           |                                                          | ClockPosition                 | <i>int</i>                               | <code>filterOri\$R(I, filterBook(TABLE), O)</code> |                                                                                                              |
|                           |                                                          | TiltDegree                    | <i>float</i>                             | <code>filterOri\$R(I, filterBook(TABLE), O)</code> |                                                                                                              |



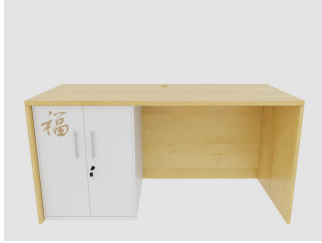

Table 1

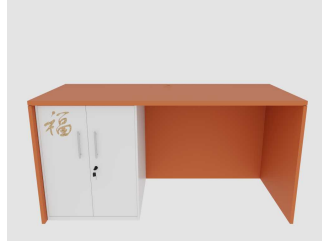

Table 2

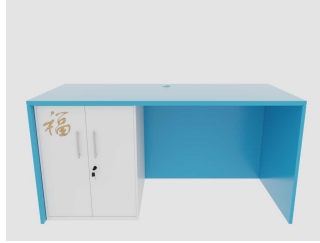

Table 3

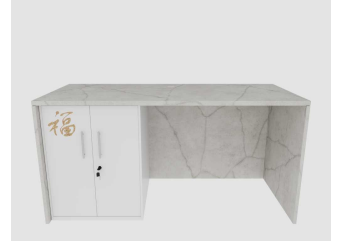

Table 4

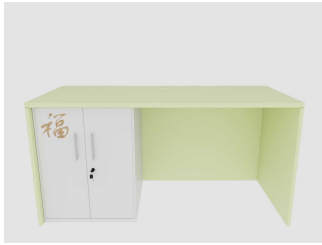

Table 5

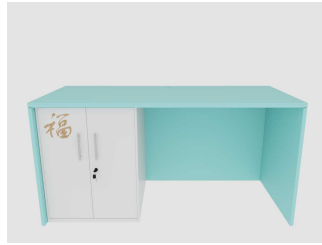

Table 6

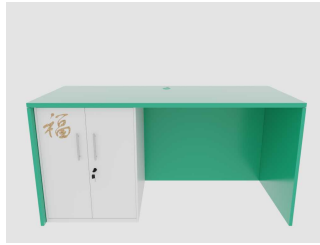

Table 7

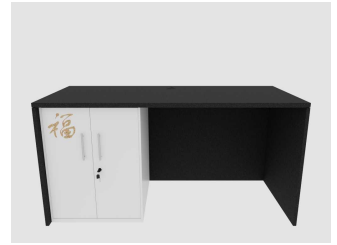

Table 8

Table 13. Tables with different colors and textures.

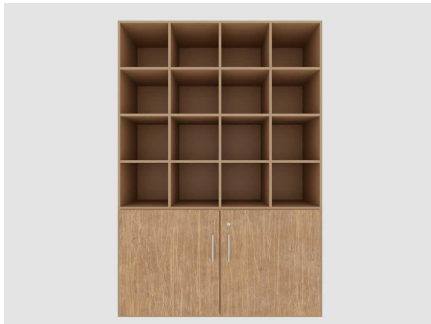

Shelf 1

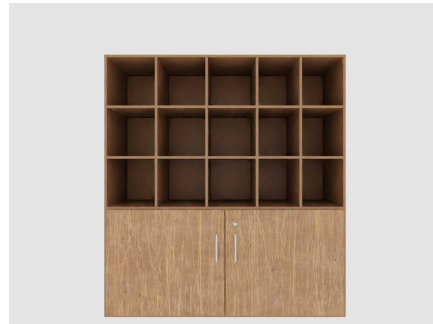

Shelf 2

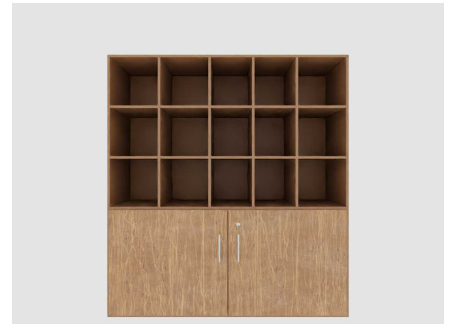

Shelf 3

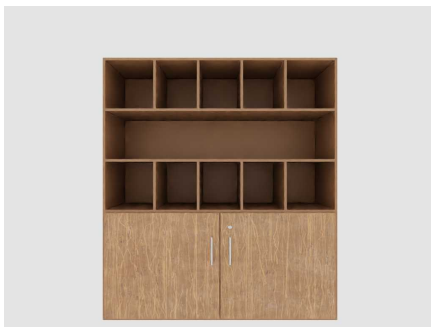

Shelf 4

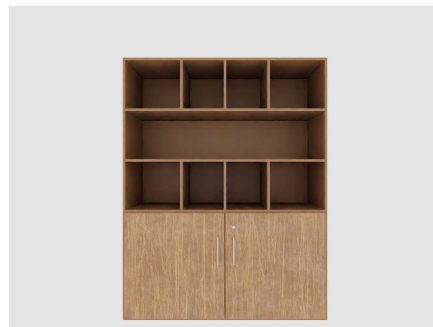

Shelf 5

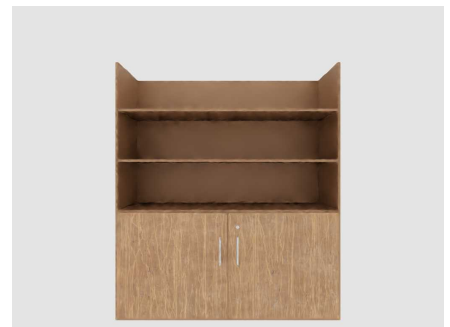

Shelf 6

Table 14. Shelf with different layouts.

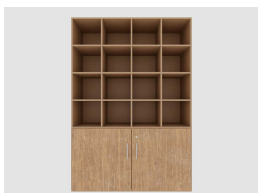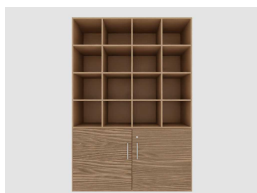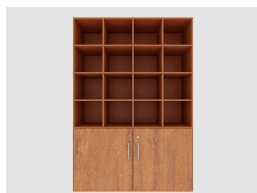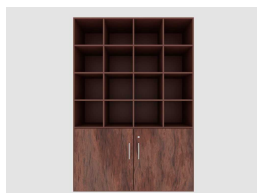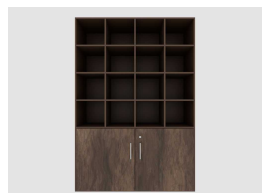

Table 15. Shelf with different textures.

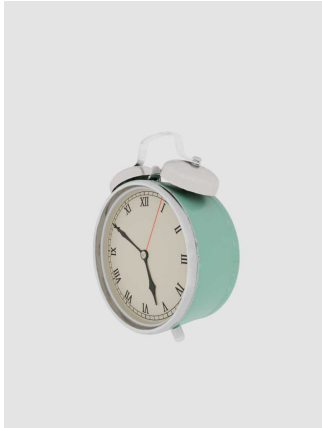

Alarm Clock

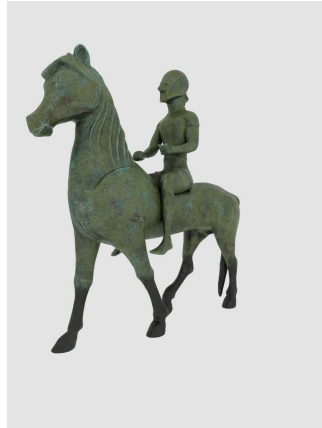

Armento Rider

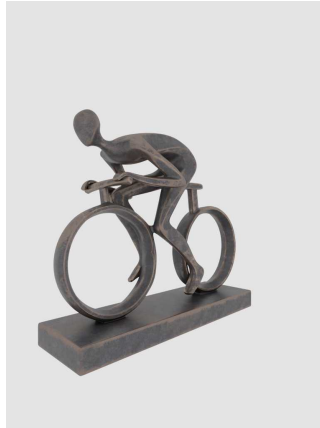

Bicycle Sculpture

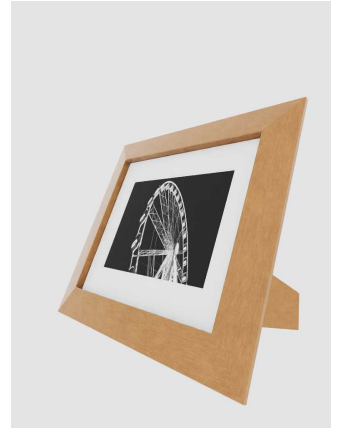

Picture Frame

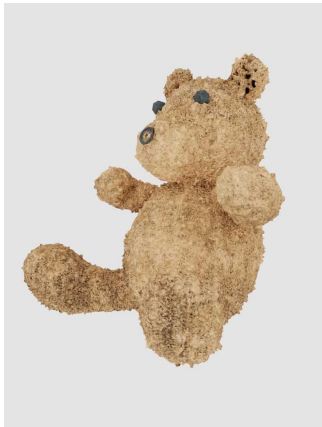

Teddy Bear

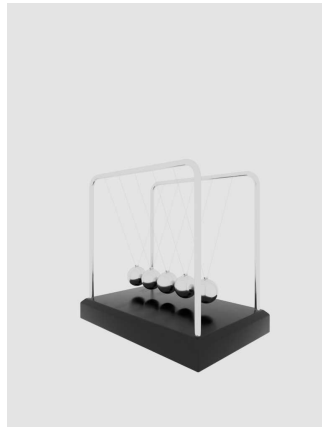

Newton's Cradle

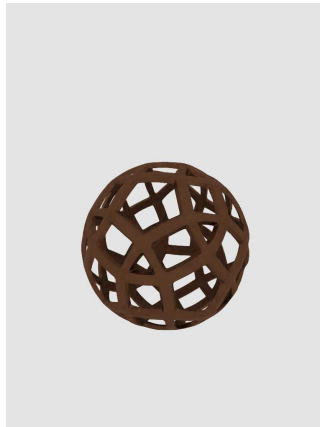

Geosphere Sculpture

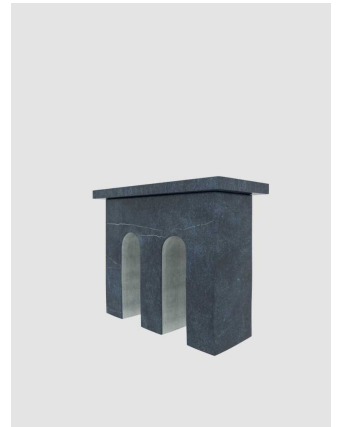

Pillar Bookend

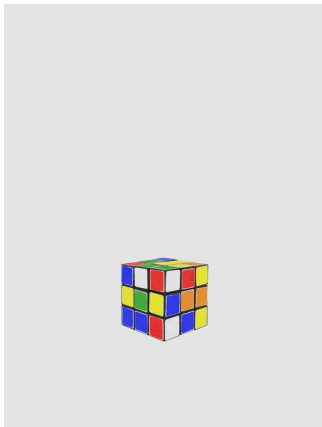

Rubik's Cube

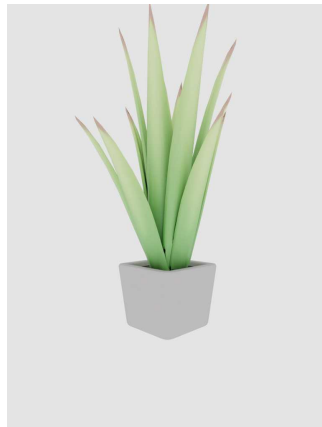

Succulents

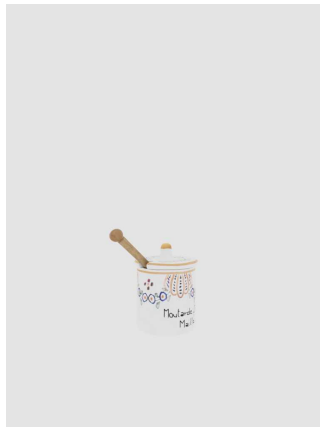

Ceramic Jar

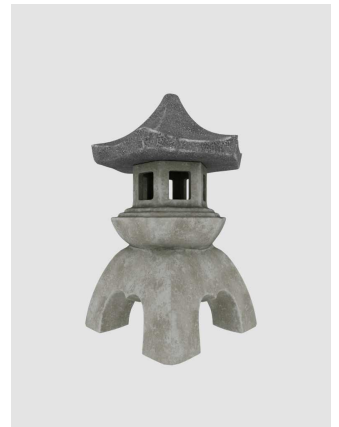

Pagoda Statue

Table 16. Near reference objects (w/ and w/o an intrinsic frame of reference) appear on the table or shelf.

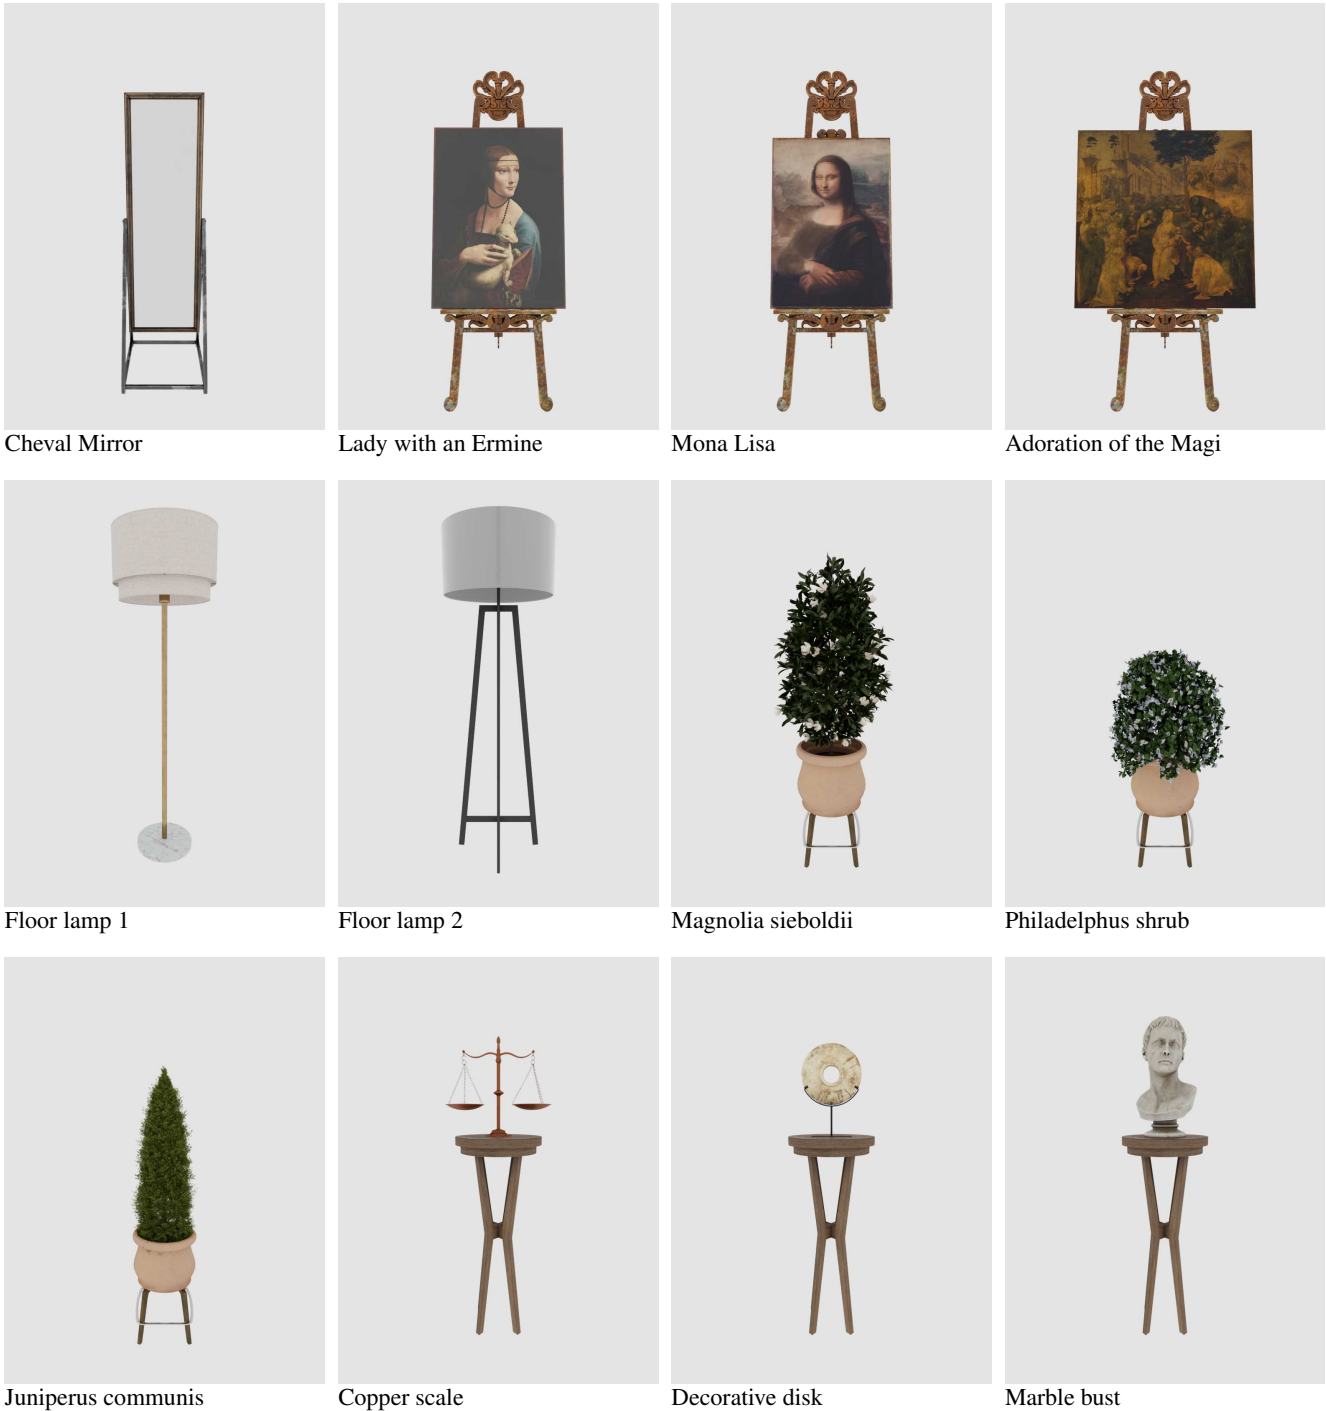

Table 17. Distant reference objects (w/ and w/o an intrinsic frame of reference) appear behind the table or besides the shelf.

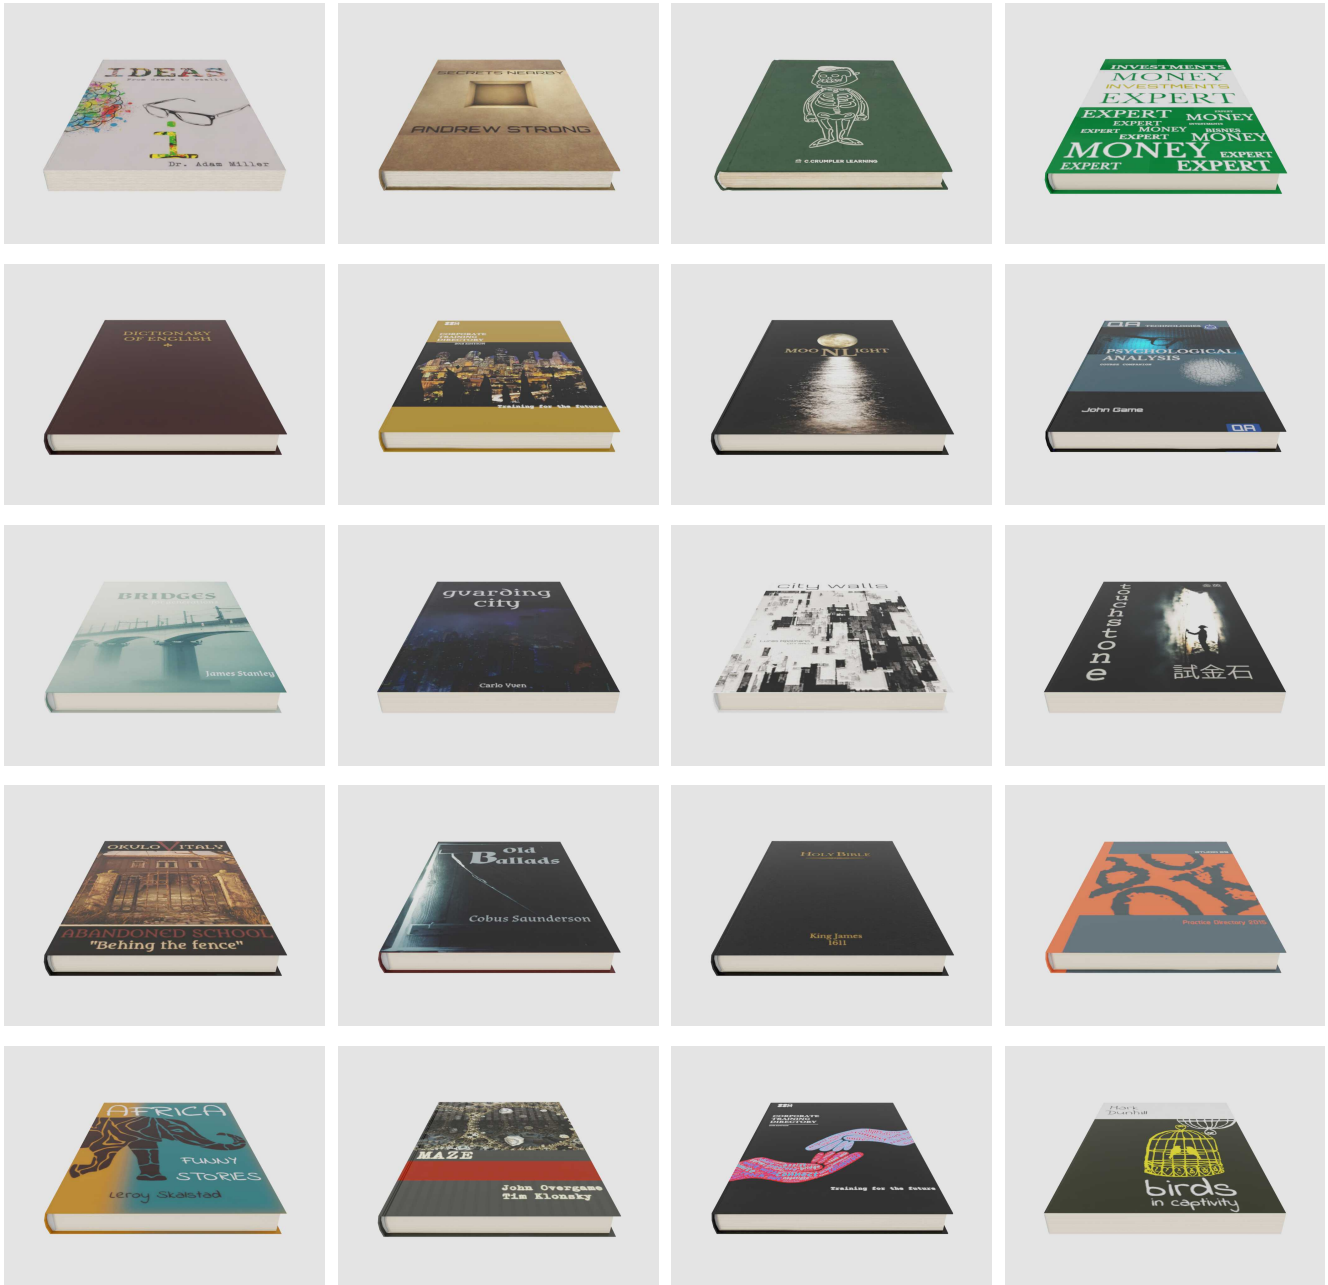

Table 18. Manipulable books. They will be auto-scaled to match three pre-defined sizes: small, medium, and large.

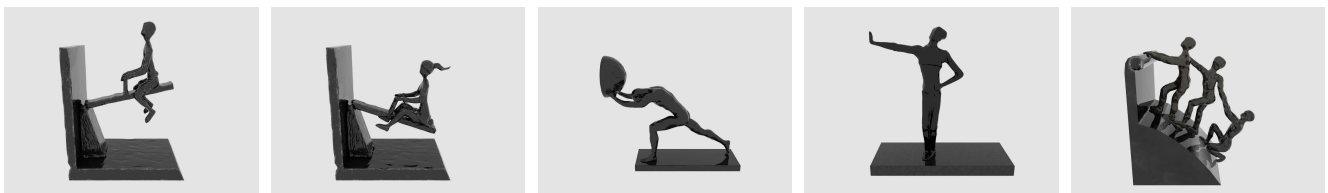

Table 19. Different bookends are used to help create tilting poses of books.

Table 20. Attributes of ESPIRE assets. Oriented assets have an intrinsic frame while non-oriented assets do not.

| Name                  | Type    | Oriented | L (cm)      | W (cm)      | H (cm)    |
|-----------------------|---------|----------|-------------|-------------|-----------|
| Alarm clock           | near    | ✓        | 7           | 13          | 17        |
| Armento Rider         | near    | ✓        | 24          | 7           | 24        |
| Bicycle sculpture     | near    | ✓        | 21          | 8           | 18        |
| Picture frame         | near    | ✓        | 13          | 22          | 18        |
| Teddy bear            | near    | ✓        | 20          | 23          | 25        |
| Newton’s cradle       | near    | ✗        | 10          | 15          | 14        |
| Geosphere sculpture   | near    | ✗        | 15          | 15          | 15        |
| Pillar bookend        | near    | ✗        | 7           | 16          | 13        |
| Rubik’s cube          | near    | ✗        | 6           | 6           | 6         |
| Succulents            | near    | ✗        | 17          | 15          | 29        |
| Ceramic jar           | near    | ✗        | 6           | 6           | 8         |
| Pagoda statue         | near    | ✗        | 13          | 14          | 21        |
| Cheval mirror         | distant | ✓        | 40          | 42          | 43        |
| Lady with an Ermine   | distant | ✓        | 62          | 59          | 52        |
| Mona Lisa             | distant | ✓        | 62          | 54          | 52        |
| Adoration of the Magi | distant | ✓        | 62          | 79          | 52        |
| Floor lamp 1          | distant | ✗        | 48          | 48          | 59        |
| Floor lamp 2          | distant | ✗        | 51          | 51          | 60        |
| Magnolia sieboldii    | distant | ✗        | 61          | 65          | 51        |
| Philadelphus shrub    | distant | ✗        | 63          | 61          | 06        |
| Juniperus communis    | distant | ✗        | 46          | 45          | 34        |
| Copper scale          | distant | ✗        | 52          | 61          | 46        |
| Decorative disk       | distant | ✓        | 52          | 52          | 43        |
| Marble bust           | distant | ✓        | 52          | 52          | 53        |
| Table 1 – 8           | table   | ✓        | 60          | 140         | 70        |
| Shelf 1               | shelf   | ✓        | 45          | 149         | 215       |
| Shelf 2               | shelf   | ✓        | 45          | 176         | 190       |
| Shelf 3               | shelf   | ✓        | 45          | 176         | 190       |
| Shelf 4               | shelf   | ✓        | 45          | 171         | 190       |
| Shelf 5               | shelf   | ✓        | 45          | 149         | 190       |
| Shelf 6               | shelf   | ✓        | 45          | 164         | 187       |
| Book-small            | book    | ✗        | 17.5 – 18.8 | 10.8 – 13.0 | 1.5 – 1.8 |
| Book-medium           | book    | ✗        | 21.6 – 25.0 | 14.0 – 17.6 | 2.0 – 2.5 |
| Book-large            | book    | ✗        | 25.4 – 30.5 | 20.3 – 24.1 | 3.7 – 4.0 |
